# Supplementary material for: The impact of population-wide lifestyle modifications on improving life expectancy in the Chinese population: a simulation study
Source: Research Square preprint supplement (doi:10.21203/rs.3.rs-5812309/v1), 2025-01-23
Supplement: Supplementary file 1 [file 8735094df6c92ff57eb244fe.docx]

**Supplementary Material.**

**Members of the China Kadoorie Biobank collaborative group:**

**International Steering Committee:** Junshi Chen, Zhengming Chen (PI), Robert Clarke, Rory Collins, Liming Li (PI), Jun Lv, Richard Peto, Robin Walters.

**International Co-ordinating Centre, Oxford:** Daniel Avery, Maxim Barnard, Derrick Bennett, Lazaros Belbasis, Ruth Boxall, Ka Hung Chan, Yiping Chen, Zhengming Chen, Charlotte Clarke, Johnathan Clarke; Robert Clarke, Huaidong Du, Ahmed Edris Mohamed, Hannah Fry, Simon Gilbert, Pek Kei Im, Andri Iona, Maria Kakkoura, Christiana Kartsonaki, Hubert Lam, Kuang Lin, James Liu, Mohsen Mazidi, Iona Millwood, Sam Morris, Qunhua Nie, Alfred Pozarickij, Maryanm Rahmati, Paul Ryder, Saredo Said, Dan Schmidt, Becky Stevens, Iain Turnbull, Robin Walters, Baihan Wang, Lin Wang, Neil Wright, Ling Yang, Xiaoming Yang, Pang Yao.

**National Co-ordinating Centre, Beijing:** Xiao Han, Can Hou, Qingmei Xia, Chao Liu, Jun Lv, Pei Pei, Dianjianyi Sun, Canqing Yu, Lang Pan.

**10 Regional Co-ordinating Centres: Qingdao CDC:** Zengchang Pang, Ruqin Gao, Shanpeng Li, Haiping Duan, Shaojie Wang, Yongmei Liu, Ranran Du, Yajing Zang, Liang Cheng, Xiaocao Tian, Hua Zhang, Yaoming Zhai, Feng Ning, Xiaohui Sun, Feifei Li. **Licang CDC:** Silu Lv, Junzheng Wang, Wei Hou. **Heilongjiang Provincial CDC:** Wei Sun, Shichun Yan, Xiaoming Cui. **Nangang CDC:** Chi Wang, Zhenyuan Wu,Yanjie Li, Quan Kang. **Hainan Provincial CDC:** Huiming Luo, Tingting Ou. **Meilan CDC:** Xiangyang Zheng, Zhendong Guo, Shukuan Wu, Yilei Li, Huimei Li. **Jiangsu Provincial CDC:** Ming Wu, Yonglin Zhou, Jinyi Zhou, Ran Tao, Jie Yang, Jian Su. **Suzhou CDC:** Fang Liu, Jun Zhang, Yihe Hu, Yan Lu, Liangcai Ma, Aiyu Tang, Shuo Zhang, Jianrong Jin, Jingchao Liu. **Guangxi Provincial CDC:** Mei Lin, Zhenzhen Lu. **Liuzhou CDC:** Lifang Zhou, Changping Xie, Jian Lan,Tingping Zhu,Yun Liu, Liuping Wei, Liyuan Zhou, Ningyu Chen, Yulu Qin, Sisi Wang. **Sichuan Provincial CDC:** Xianping Wu, Ningmei Zhang, Xiaofang Chen, Xiaoyu Chang. **Pengzhou CDC:** Mingqiang Yuan, Xia Wu, Xiaofang Chen, Wei Jiang, Jiaqiu Liu, Qiang Sun. **Gansu Provincial CDC:** Faqing Chen, Xiaolan Ren, Caixia Dong. **Maiji CDC:** Hui Zhang, Enke Mao, Xiaoping Wang, Tao Wang, Xi zhang. **Henan Provincial CDC:** Kai Kang, Shixian Feng, Huizi Tian, Lei Fan. **Huixian CDC:** XiaoLin Li, Huarong Sun, Pan He, Xukui Zhang. **Zhejiang Provincial CDC:** Min Yu, Ruying Hu, Hao Wang. **Tongxiang CDC**: Xiaoyi Zhang, Yuan Cao, Kaixu Xie, Lingli Chen, Dun Shen. **Hunan Provincial CDC:** Xiaojun Li, Donghui Jin, Li Yin, Huilin Liu, Zhongxi Fu. **Liuyang CDC:** Xin Xu, Hao Zhang, Jianwei Chen,Yuan Peng, Libo Zhang, Chan Qu.

**Assessment of candidate predictors**

The CKB collected information using a laptop-based questionnaire with built-in functions to avoid missing items and logic errors. Weight, height, blood pressure, and resting heart rate were measured with well-calibrated instruments. Ever smokers were asked about their smoking frequency, type, and amount of tobacco smoked per day. Former smokers were also asked how long they had stopped smoking and why they had quit. Participants were asked about their typical drinking frequency, as well as those who drank at least once a week, the type of alcoholic beverage they drank habitually, and the amount of alcohol drunk on a typical drinking day in the previous year. For physical activity, the usual type and duration of activities in occupational, commuting, domestic, and leisure-time-related domains in the previous year were collected. To calculate the daily total physical activity level, we multiplied the metabolic equivalent of task (MET) value of each type of activity by the hours spent on that activity per day then summed the MET-hours for all activities.8 We used a validated qualitative food frequency questionnaire (FFQ) to assess habitual dietary intakes in the previous year.9 In the second resurvey, we also asked about the amount consumed by each food group on a typical consumption day.

Predictors were assessed similarly in CNHS. The questions about smoking were basically the same as those in the CKB questionnaire, with the exception that only cigarettes were used to calculate the daily smoking amount. A quantitative FFQ was used to collect information on the frequency and amount of various foods and alcoholic drinks consumed in the previous year. Physical activity was investigated using an adapted version of the International Physical Activity Questionnaire (IPAQ)-long form, and total physical activity level was calculated in the same way as in the CKB.

**Calculation of the usual** **intake amount for each baseline frequency group**

In the CKB, we used the resurvey data to estimate the usual intake amount of each baseline frequency group for fresh fruits, fresh vegetables, red meat, and fish/seafood, using the following steps with fresh fruits as an example:11

1. We first calculated the mean intake amount on a typical consuming day for participants in each group, namely “never/rarely”, “monthly”, “1-3 days/wk”, “4-6 days/wk”, “daily”, using data collected during the 2nd resurvey (n=25,041). The corresponding values for each group were 0 g/d for the “never/rarely” group, 137.0 g/d for the “monthly” group, 142.5 g/d for the “1-3 days/wk” group, 140.3 g/d for the “4-6 days/wk” group, and 168.6 g/d for the “daily” group.
2. Assuming that the intake amount on a typical consuming day did not vary much from the baseline to the 2nd resurvey (i.e., people may change how frequently they consume fruits but the daily amount of fresh fruits consumption stays roughly the same), the mean daily grams derived in step 1 was used as the proxy for baseline mean daily grams.
3. The “baseline intake amount” for each group (column B in Supplementary Table 1) were estimated by multiplying the mean daily grams intake by the number of consuming days per month and dividing by 30. The number of consuming days per month assigned to each group was 0 for the “never/rarely” group, 2.5 days for the “monthly” group, 8.6 days for the “1-3 days/wk” group, 21.5 days for the “4-6 days/wk” group, and 30 days for the “daily” group. The estimates of the baseline intake amount were 0g, 11.4g, 40.8g, 100.5g, and 168.6g, respectively, for “never/rarely”, “monthly”, “1-3 days/wk”, “4-6 days/wk”, and “daily” group.
4. The consumption frequency recorded at the 1st resurvey (n=19,786) was used to assess the variation in fresh fruits consumption from the baseline. The “usual intake amount” for each group (column U in Supplementary Table 1) was calculated by multiplying the “baseline intake amount” for each group by the percentage of participants in each of the group at the 1st resurvey. For example, for the “never/rarely” group at baseline, 17.9% remained at this group at the 1st resurvey, 55.7% switched to the “monthly” group, 18.0% switched to the “1-3 days/wk” group, 4.2% switched to the “4-6 days/wk” group, and 4.2% switched to the “daily” group. The “usual intake amount” for the baseline “never/rarely” group was therefore equal to 17.9%×0+ 55.7%×11.4+ 18.0%×40.8+ 4.2%×100.5+ 4.2%×168.6=25 g/d. Corresponding values for other baseline groups, namely “monthly”, “1-3 days/wk”, “4-6 days/wk”, and “daily” group were 32.6g/d, 56.2g/d, 79.3g/d, and 123.4g/d, respectively.
5. The “usual intake amount” was then assigned to each individual participant in the corresponding baseline group as the proxy of the intake amount.
6. Using the same approach as described above, the “usual intake amount” for each baseline group of fresh vegetables, red meat, and seafood were presented in Supplementary Table 2.

**Supplementary Table 1. Calculation of the usual amount (g/day) for each baseline category of fresh fruits consumption based on 19,786 participants who attended the first resurvey in 2008.**

| Baseline  n | | 1st resurvey (mean 2.6 years later)  **F** | | | | | Consumption days per month | Mean daily grams* | Baseline consumption (g/day)†  **B** | Usual consumption (g/day)‡  **U** |
| --- | --- | --- | --- | --- | --- | --- | --- | --- | --- | --- |
| Never/rarely  1 | Monthly  2 | 1-3 days/wk  3 | 4-6 days/wk  4 | Daily  5 |
| 1 | Never/rarely | 17.9%  (244) | 55.7%  (761) | 18.0%  (246) | 4.2%  (58) | 4.2%  (57) | 0 | -- | B1 = 0 | U1 = 25.0 |
| 2 | Monthly | 7.4%  (496) | 52.1%  (3,504) | 29.0%  (1,952) | 6.8%  (460) | 4.7%  (316) | 2.5 | 137.0 | B2 = 11.4 | U2 = 32.6 |
| 3 | 1-3 days/wk | 4.0%  (250) | 31.7%  (1,981) | 37.4%  (2,339) | 11.7%  (729) | 15.2%  (950) | 8.6 | 142.5 | B3 = 40.8 | U3 = 56.2 |
| 4 | 4-6 days/wk | 1.6%  (29) | 20.1%  (368) | 35.0%  (641) | 15.0%  (275) | 28.2%  (516) | 21.5 | 140.3 | B4 = 100.5 | U4 = 79.3 |
| 5 | Daily | 1.2%  (45) | 6.8%  (246) | 18.3%  (662) | 13.2%  (476) | 60.5%  (2,185) | 30 | 168.6 | B5 = 168.6 | U5 = 123.4 |

*The mean daily grams were calculated using data from the 2nd resurvey (n=25,041) and used as a proxy for baseline mean daily grams, assuming that the daily amount of fresh fruits consumption did not change significantly from the baseline to the 2nd resurvey (i.e., people may change how frequently they consume fruits but the daily amount of fresh fruits consumption stays roughly the same).

†The baseline intake amount for each group was estimated by multiplying the mean daily grams intake by the number of consuming days per month and dividing by 30.

‡By accounting for the variation in consumption frequency from the baseline, the usual intake amount for each group was estimated using the following formula: Un = . F denotes the percentage in each cell, B the baseline grams per day for each baseline category, and U the usual grams per day for each baseline category.

**Supplementary Table 2. Usual intake amount for each baseline group of fresh vegetables, red meat, and seafood.**

|  | Usual intake amount (g/day) | | |
| --- | --- | --- | --- |
| Fresh vegetables | Red meat | Seafood |
| Never/rarely | 194.3 | 11.7 | 3.0 |
| Monthly | 204.8 | 17.9 | 19.7 |
| 1-3 days/wk | 215.3 | 34.5 | 31.3 |
| 4-6 days/wk | 210.6 | 47.0 | 44.4 |
| Daily | 234.1 | 65.2 | 50.5 |

**Supplementary Table 3. Characteristics of the study participants in the China Kadoorie Biobank (CKB) and the China Nutrition and Health Surveillance (CNHS).**

|  | CKB population | | | | |  | CNHS population | |
| --- | --- | --- | --- | --- | --- | --- | --- | --- |
| Men | |  | Women | |  | Men | Women |
| Derivation | Validation |  | Derivation | Validation |  |
| No. of participants | 140,135 | 70,068 |  | 201,678 | 100,840 |  | 31,515 | 36,049 |
| Age, years | 52.4 (10.9) | 52.4 (10.9) |  | 51.0 (10.5) | 50.9 (10.5) |  | 55.5 (12.5) | 54.5 (12.3) |
| Urban area, % | 43.3 | 43.7 |  | 44.6 | 44.6 |  | 51.3 | 49.6 |
| Highest education, % |  |  |  |  |  |  |  |  |
| No formal school | 8.9 | 8.8 |  | 25.4 | 25.2 |  | 4.5 | 18.9 |
| Primary school | 33.4 | 33.2 |  | 31.5 | 31.3 |  | 28.5 | 33.2 |
| Middle school | 32.4 | 32.5 |  | 25.3 | 25.5 |  | 37.3 | 27.3 |
| High school | 17.5 | 17.4 |  | 13.4 | 13.6 |  | 17.8 | 11.1 |
| College/university | 7.8 | 8.1 |  | 4.4 | 4.4 |  | 12.0 | 9.5 |
| Marital status, % |  |  |  |  |  |  |  |  |
| Married | 92.9 | 93.0 |  | 89.0 | 88.9 |  | 94.6 | 93.3 |
| Widowed | 4.1 | 4.0 |  | 9.3 | 9.3 |  | 1.7 | 5.4 |
| Separated/divorced | 1.6 | 1.6 |  | 1.5 | 1.5 |  | 1.3 | 0.5 |
| Never married | 1.4 | 1.5 |  | 0.2 | 0.2 |  | 2.4 | 0.8 |
| Smoking, %* |  |  |  |  |  |  |  |  |
| Never | 25.6 | 25.7 |  | 96.8 | 96.8 |  | 35.5 | 96.8 |
| Former | 6.7 | 6.8 |  | 0.4 | 0.4 |  | 12.9 | 0.8 |
| Current (number of cigarettes or equivalents per day) | | | | | | | | |
| <20 | 30.3 | 29.9 |  | 2.4 | 2.4 |  | 23.8 | 1.8 |
| ≥20 | 37.4 | 37.6 |  | 0.5 | 0.5 |  | 27.8 | 0.6 |
| Alcohol intake, %† |  |  |  |  |  |  |  |  |
| Less than daily | 70.7 | 70.6 |  | 98.2 | 98.2 |  | 83.2 | 98.6 |
| Current daily (g of pure alcohol per day) | | | | | | | | |
| 1-29 | 4.7 | 4.7 |  | 0.6 | 0.6 |  | 4.9 | 1.0 |
| 30-59 | 6.8 | 6.8 |  | 0.2 | 0.3 |  | 4.6 | 0.2 |
| ≥60 | 17.8 | 17.8 |  | 1.0 | 1.0 |  | 7.3 | 0.2 |
| Physical activity, MET-h/d | 22.1 (15.3) | 21.9 (15.2) |  | 20.4 (12.8) | 20.4 (12.7) |  | 16.3 (20.3) | 13.7 (16.4) |
| Food consumption, g/d‡ |  |  |  |  |  |  |  |  |
| Fresh fruits | 56.9 (31.3) | 56.9 (31.3) |  | 63.9 (34.9) | 63.8 (34.8) |  | 79.7 (95.1) | 92.6 (102.1) |
| Red meat | 44.3 (17.1) | 44.3 (17.1) |  | 41.3 (17.3) | 41.3 (17.3) |  | 72.5 (76.6) | 53.7 (63.9) |
| Fish/seafood | 21.8 (14.1) | 21.9 (14.2) |  | 20.6 (14.2) | 20.6 (14.2) |  | 21.1 (33.8) | 17.3 (31.2) |
| Body mass index (kg/m2), % |  |  |  |  |  |  |  |  |
| <18.5 | 4.5 | 4.4 |  | 4.3 | 4.3 |  | 3.1 | 3.0 |
| 18.5-23.9 | 53.8 | 54.0 |  | 50.4 | 50.6 |  | 42.7 | 46.4 |
| 24.0-27.9 | 32.8 | 32.7 |  | 33.6 | 33.4 |  | 38.4 | 35.2 |
| ≥28 | 8.9 | 9.0 |  | 11.8 | 11.7 |  | 15.9 | 15.4 |
| Systolic blood pressure, mmHg | 132.8 (20.0) | 132.8 (20.0) |  | 129.9 (22.0) | 129.9 (22.1) |  | 137.3 (19.9) | 136.2 (22.2) |
| Resting heart rate, beats/minute | 77.7 (12.1) | 77.8 (12.1) |  | 79.6 (11.6) | 79.7 (11.6) |  | 75.1 (11.3) | 76.9 (10.6) |
| Self-rated good health, % |  |  |  |  |  |  |  |  |
| Excellent/good | 49.1 | 49.4 |  | 43.2 | 43.6 |  | 44.9 | 41.5 |
| Fair | 41.9 | 41.7 |  | 45.4 | 45.1 |  | 46.5 | 47.8 |
| Poor | 8.9 | 8.9 |  | 11.4 | 11.3 |  | 8.6 | 10.7 |
| Prevalent disease, % |  |  |  |  |  |  |  |  |
| Stroke | 2.3 | 2.4 |  | 1.3 | 1.3 |  | 3.4 | 3.0 |
| Cancer | 0.5 | 0.5 |  | 0.5 | 0.5 |  | 1.6 | 2.1 |
| COPD | 8.8 | 8.6 |  | 6.1 | 6.2 |  | 5.6 | 3.8 |
| Diabetes | 5.6 | 5.5 |  | 6.2 | 6.1 |  | 4.1 | 4.4 |

MET-h/d indicates metabolic equivalent task hours per day; COPD, chronic obstructive pulmonary disease.

The baseline characteristics of the CKB population were shown. Data are presented as percentages or means (standard deviations), if applicable.

*Former smokers were those who had quit smoking for reasons other than illness. Participants who had quit smoking due to illness were included in the current smokers.

†Less than daily group included both never-regular drinkers and current weekly drinkers. Former alcohol drinkers were included in the heavy drinking category (≥60 g of pure alcohol per day).

‡The food consumption amount of the CKB population was estimated as described in Supplementary Table 1.

**Supplementary Table 4. HRs (95% CIs) of all-cause mortality for all predictor variables in the whole China Kadoorie Biobank population for men and women.**

|  | Men (n=210,203) | | |  | Women (n=302,518) | | |
| --- | --- | --- | --- | --- | --- | --- | --- |
| Deaths | Deaths/PYs (/1,000) | HRs (95% CIs) |  | Deaths | Deaths/PYs (/1,000) | HRs (95% CIs) |
| Age (years) |  |  |  |  |  |  |  |
| Linear | -- | -- | 1.08 (1.08-1.08) |  | -- | -- | 1.08 (1.07-1.08) |
| Squared | -- | -- | 1.00 (1.00-1.00) |  | -- | -- | 1.00 (1.00-1.00) |
| Highest education |  |  |  |  |  |  |  |
| No formal school | 5,797 | 28.9 | 1.00 (Reference) |  | 11,302 | 12.6 | 1.00 (Reference) |
| Primary school | 14,154 | 18.0 | 0.86 (0.83-0.89) |  | 8,125 | 7.2 | 0.91 (0.88-0.94) |
| Middle school | 7,105 | 8.9 | 0.80 (0.77-0.83) |  | 3,163 | 3.4 | 0.82 (0.79-0.86) |
| High school | 3,307 | 7.7 | 0.68 (0.65-0.72) |  | 1,510 | 3.1 | 0.77 (0.72-0.81) |
| College/university | 1,593 | 8.3 | 0.57 (0.54-0.61) |  | 493 | 3.1 | 0.69 (0.63-0.77) |
| Marital status |  |  |  |  |  |  |  |
| Married | 27,340 | 12.1 | 1.00 (Reference) |  | -- | -- | -- |
| Widowed | 3,277 | 38.1 | 1.19 (1.15-1.24) |  | -- | -- | -- |
| Separated/divorced | 594 | 16.0 | 1.71 (1.58-1.86) |  | -- | -- | -- |
| Never married | 745 | 22.6 | 1.81 (1.68-1.95) |  | -- | -- | -- |
| Smoking* |  |  |  |  |  |  |  |
| Never | 7,007 | 11.3 | 1.00 (Reference) |  | 22,364 | 6.4 | 1.00 (Reference) |
| Former | 2,333 | 14.6 | 1.06 (1.01-1.11) |  | 281 | 21.2 | 1.16 (1.03-1.30) |
| Current (number of cigarettes or equivalents per day) | | | | | | | |
| <20 | 11,214 | 15.6 | 1.25 (1.21-1.29) |  | 1,621 | 20.3 | 1.34 (1.26-1.41) |
| ≥20 | 11,402 | 12.5 | 1.33 (1.29-1.38) |  | 327 | 20.5 | 1.60 (1.43-1.79) |
| Alcohol intake† |  |  |  |  |  |  |  |
| Less than daily | 20,610 | 12.0 | 1.00 (Reference) |  | 23,832 | 6.7 | 1.00 (Reference) |
| Current daily (g of pure alcohol per day) | | | | | | | |
| 1-29 | 1,657 | 14.7 | 1.00 (0.95-1.05) |  | 204 | 9.8 | 0.96 (0.83-1.10) |
| 30-59 | 2,129 | 12.8 | 1.06 (1.01-1.11) |  | 89 | 10.8 | 1.04 (0.84-1.29) |
| ≥60 | 7,560 | 18.0 | 1.23 (1.20-1.27) |  | 468 | 13.3 | 1.10 (1.00-1.21) |
| Ln(physical activity level [MET-h/day]) | -- | -- | 0.91 (0.91-0.92) |  | -- | -- | 0.83 (0.82-0.84) |
| Food consumption (per 10g/d) |  |  |  |  |  |  |  |
| Fresh fruits | -- | -- | 0.99 (0.98-0.99) |  | -- | -- | 0.98 (0.98-0.99) |
| Red meat | -- | -- | 0.97 (0.96-0.98) |  | -- | -- | 0.97 (0.96-0.98) |
| Fish/seafood | -- | -- | 0.96 (0.95-0.98) |  | -- | -- | 0.94 (0.92-0.95) |
| Body mass index (kg/m2) |  |  |  |  |  |  |  |
| <18.5 | 3,082 | 31.7 | 1.52 (1.47-1.59) |  | 2,169 | 14.8 | 1.52 (1.45-1.60) |
| 18.5-23.9 | 17,793 | 13.7 | 1.00 (Reference) |  | 11,400 | 6.3 | 1.00 (Reference) |
| 24.0-27.9 | 8,668 | 10.8 | 0.85 (0.83-0.88) |  | 7,609 | 6.3 | 0.90 (0.87-0.92) |
| ≥28 | 2,413 | 11.1 | 0.86 (0.82-0.90) |  | 3,415 | 8.1 | 0.93 (0.90-0.97) |
| Ln(systolic blood pressure [mmHg]) | -- | -- | 3.52 (3.26-3.79) |  | -- | -- | 3.75 (3.45-4.07) |
| Resting heart rate (beats/minute) | -- | -- | 1.01 (1.01-1.01) |  | -- | -- | 1.01 (1.00-1.01) |
| Self-rated health |  |  |  |  |  |  |  |
| Excellent/good | 11,711 | 9.6 | 1.00 (Reference) |  | 7,353 | 4.6 | 1.00 (Reference) |
| Fair | 14,626 | 14.6 | 1.18 (1.15-1.21) |  | 11,564 | 7.1 | 1.17 (1.13-1.20) |
| Poor | 5,619 | 28.5 | 1.74 (1.68-1.80) |  | 5,676 | 14.4 | 1.64 (1.58-1.70) |
| Stroke at baseline |  |  |  |  |  |  |  |
| No | 29,702 | 12.6 | 1.00 (Reference) |  | 23,351 | 6.6 | 1.00 (Reference) |
| Yes | 2,254 | 48.5 | 1.62 (1.54-1.69) |  | 1,242 | 29.9 | 1.61 (1.52-1.71) |
| Cancer at baseline |  |  |  |  |  |  |  |
| No | 31,499 | 13.1 | 1.00 (Reference) |  | 24,196 | 6.8 | 1.00 (Reference) |
| Yes | 457 | 53.4 | 2.18 (1.98-2.39) |  | 397 | 23.1 | 2.13 (1.92-2.35) |
| COPD at baseline |  |  |  |  |  |  |  |
| No | 25,825 | 11.7 | 1.00 (Reference) |  | 21,071 | 6.2 | 1.00 (Reference) |
| Yes | 6,131 | 31.5 | 1.33 (1.29-1.37) |  | 3,522 | 16.4 | 1.39 (1.34-1.44) |
| Diabetes at baseline |  |  |  |  |  |  |  |
| No | 28,536 | 12.5 | 1.00 (Reference) |  | 20,526 | 6.1 | 1.00 (Reference) |
| Yes | 3,420 | 27.7 | 1.52 (1.46-1.58) |  | 4,067 | 19.8 | 1.78 (1.72-1.85) |

PYs indicates person-years; HR, hazard ratio; CI, confidence interval; MET-h/d, metabolic equivalent task hours per day; COPD, chronic obstructive pulmonary disease; -, not applicable.

All continuous predictor variables were centered as follows: age at 50 years, physical activity level at 20 MET-h/d, daily fresh fruits intake at 80g, daily red meat intake at 50g, daily fish/seafood intake at 20g, systolic blood pressure at 120 mmHg, and resting heart rate at 80 beats/minute.

*Former smokers referred to those having stopped smoking for reasons other than illness. Participants who had stopped smoking due to illness were classified as current smokers.

†Less than daily group included both never-regular drinkers and current weekly drinkers. Former alcohol drinkers were included in the heavy drinking category (≥60 g of pure alcohol per day).

**Supplementary Table 5. Life expectancy at 30 years and the gained life years under different scenarios for smoking and alcohol intake in men and women.**

|  | Men | |  | Women | |
| --- | --- | --- | --- | --- | --- |
| Life expectancy (95% CI), 30y | Gained life years (95% CI) |  | Life expectancy (95% CI), 30y | Gained life years (95% CI) |
| **Base scenario*** | 45.46 (44.85-46.27) | -- |  | 47.00 (46.23-47.86) | -- |
| Smoking |  |  |  |  |  |
| Ideal scenario | 46.13 (45.51-47.00) | 0.68 (0.44-0.91) |  | 47.05 (46.30-47.90) | 0.05 (0.00-0.09) |
| Practical scenario | 45.86 (45.27-46.70) | 0.40 (0.26-0.54) |  | -- | -- |
| Alternative scenario† | 46.47 (45.83-47.24) | 1.02 (0.88-1.17) |  | 47.11 (46.34-47.95) | 0.10 (0.07-0.14) |
| Healthy China 2030‡ | 45.60 (45.03-46.42) | 0.14 (0.09-0.19) |  | -- | -- |
| Alcohol intake |  |  |  |  |  |
| Ideal scenario | 45.61 (44.98-46.44) | 0.15 (0.08-0.23) |  | 47.01 (46.23-47.87) | 0.01 (0.00-0.02) |
| Alternative scenario§ | 45.63 (45.02-46.44) | 0.17 (0.13-0.20) |  | 47.00 (46.23-47.86) | 0.00 (0.00-0.01) |
| Physical activity |  |  |  |  |  |
| Ideal scenario | 46.18 (45.58-46.95) | 0.72 (0.62-0.84) |  | 48.47 (47.78-49.23) | 1.47 (1.30-1.67) |
| Practical scenario | 45.99 (45.38-46.77) | 0.53 (0.46-0.62) |  | 48.09 (47.38-48.88) | 1.09 (0.96-1.25) |
| Healthy China 2030‖ | 45.63 (45.02-46.43) | 0.17 (0.15-0.20) |  | 47.39 (46.63-48.22) | 0.38 (0.34-0.43) |

CI indicates confidence interval.

*Exposure patterns for all lifestyle factors remained unchanged.

†The whole population is assumed to never smoke.

‡The goal is to reduce smoking prevalence in the whole population to 20%, and we assumed that this would be achieved only by reducing smoking prevalence in men.

§All excessive alcohol users in the whole population are assumed to be non-daily drinkers.

‖The goal is to increase the proportion of individuals who engage in regular physical activity to 40%. Regular physical activity was defined as engaging in physical activity of moderate intensity or higher ≥3 times per week, each time lasting 30 minutes or more.


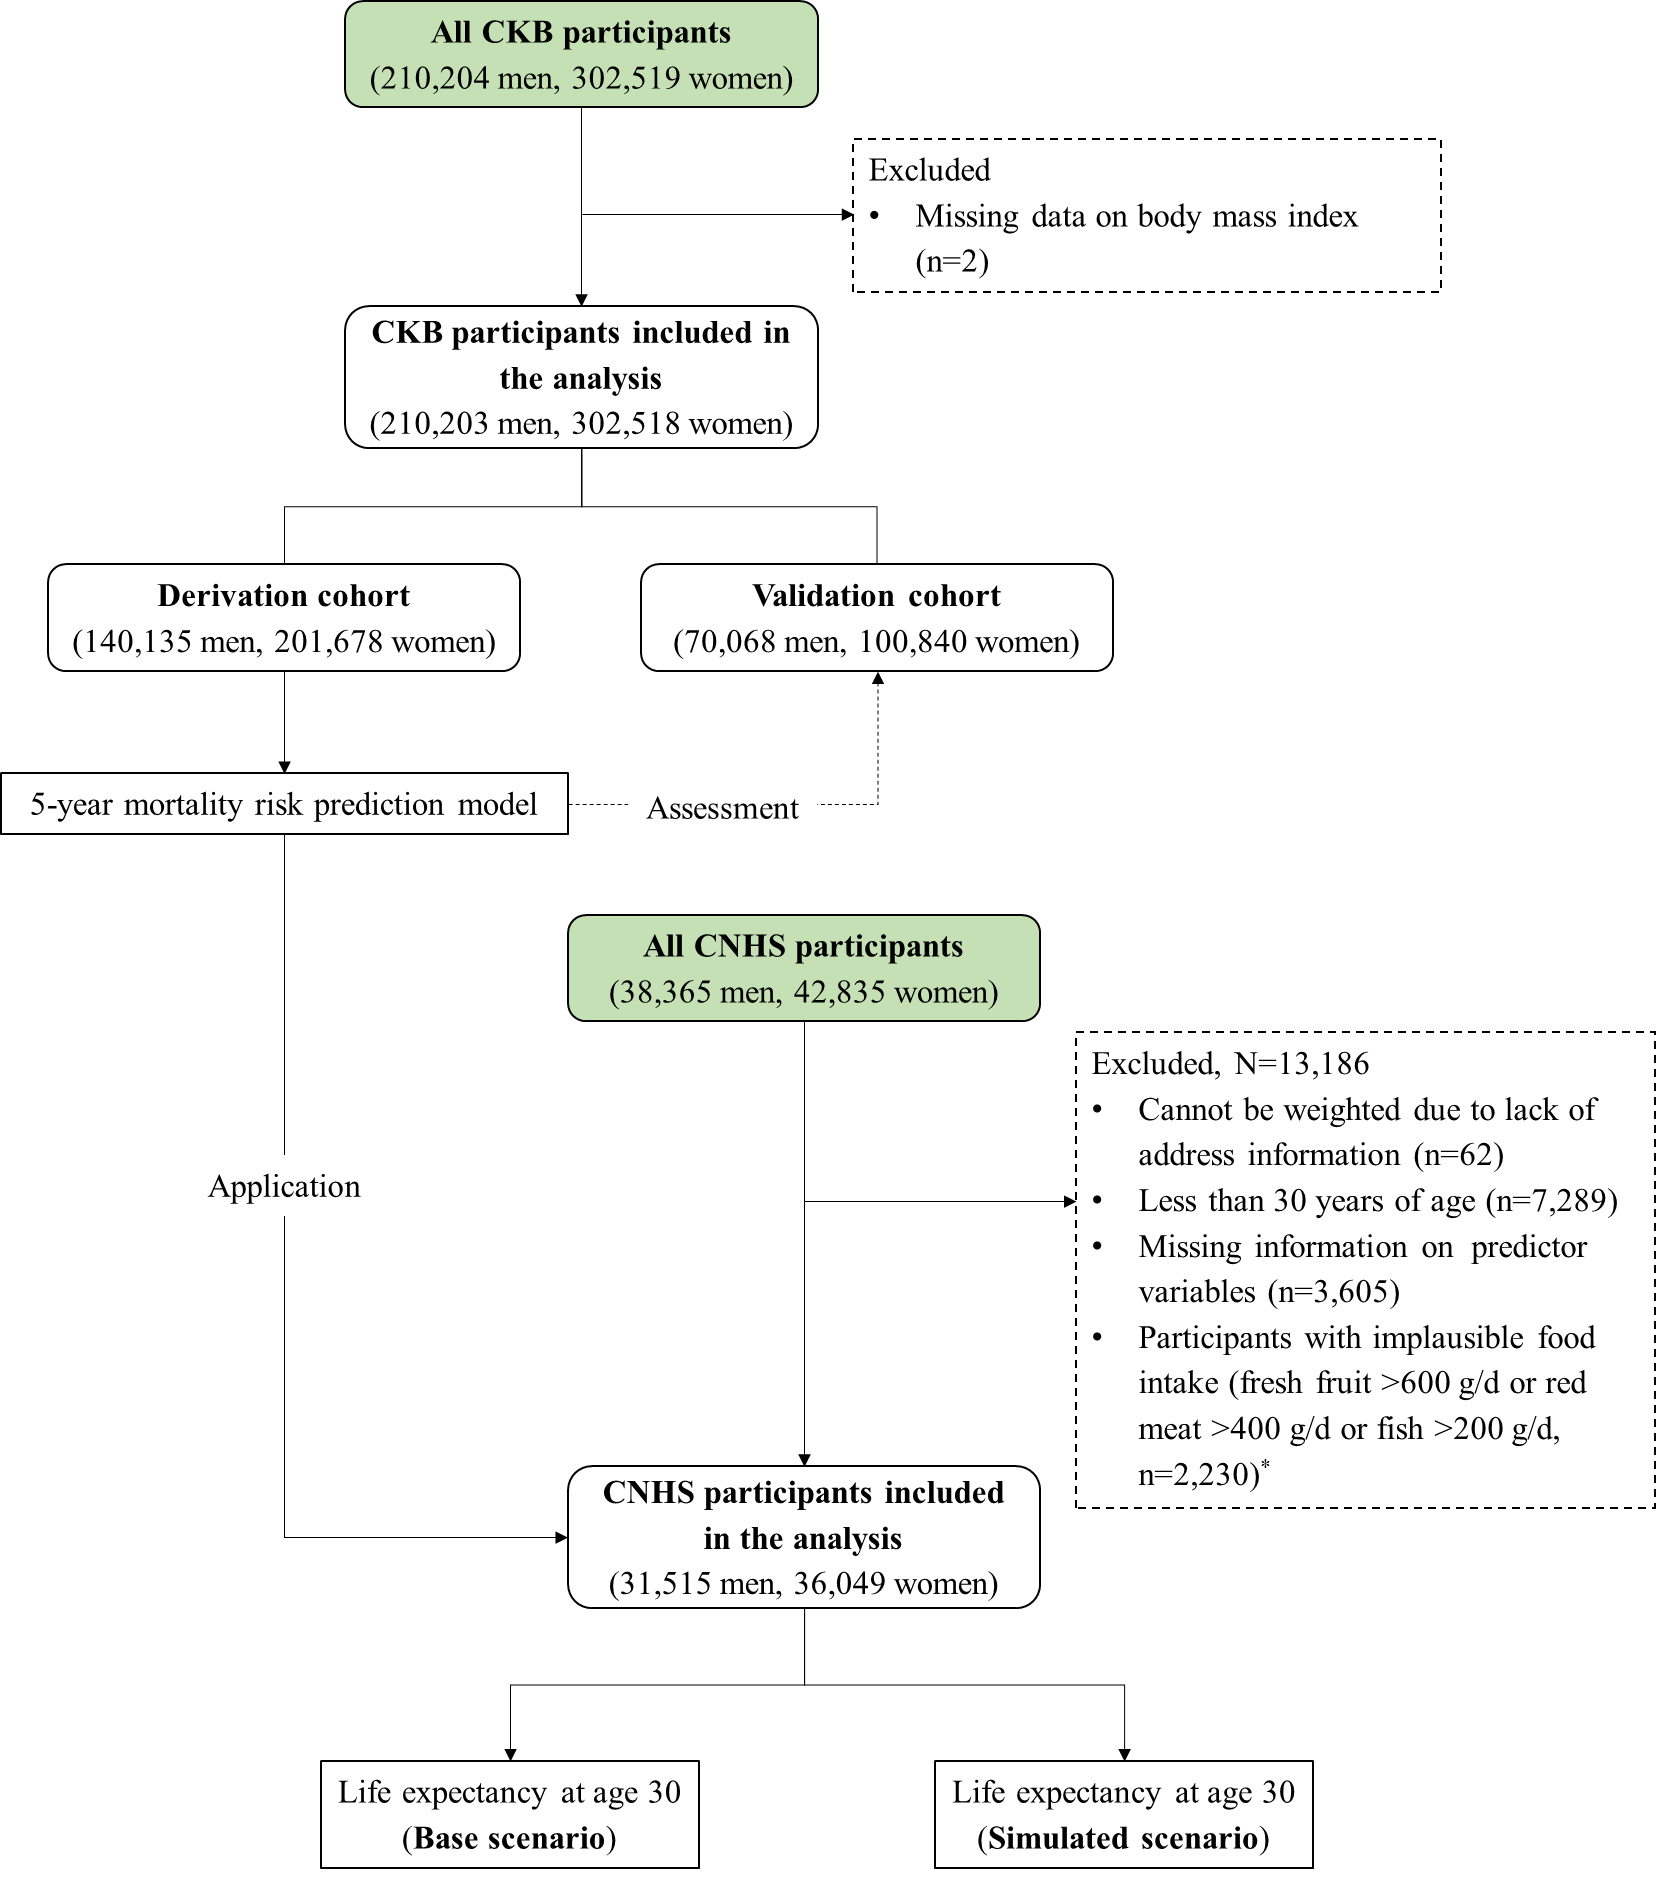


**Supplementary Figure 1. Analytic flow chart of the primary analysis.**

CKB indicates China Kadoorie Biobank; CNHS, China Nutrition and Health Surveillance.

*The cut-off values were approximately equal to the 99th percentile values.

**
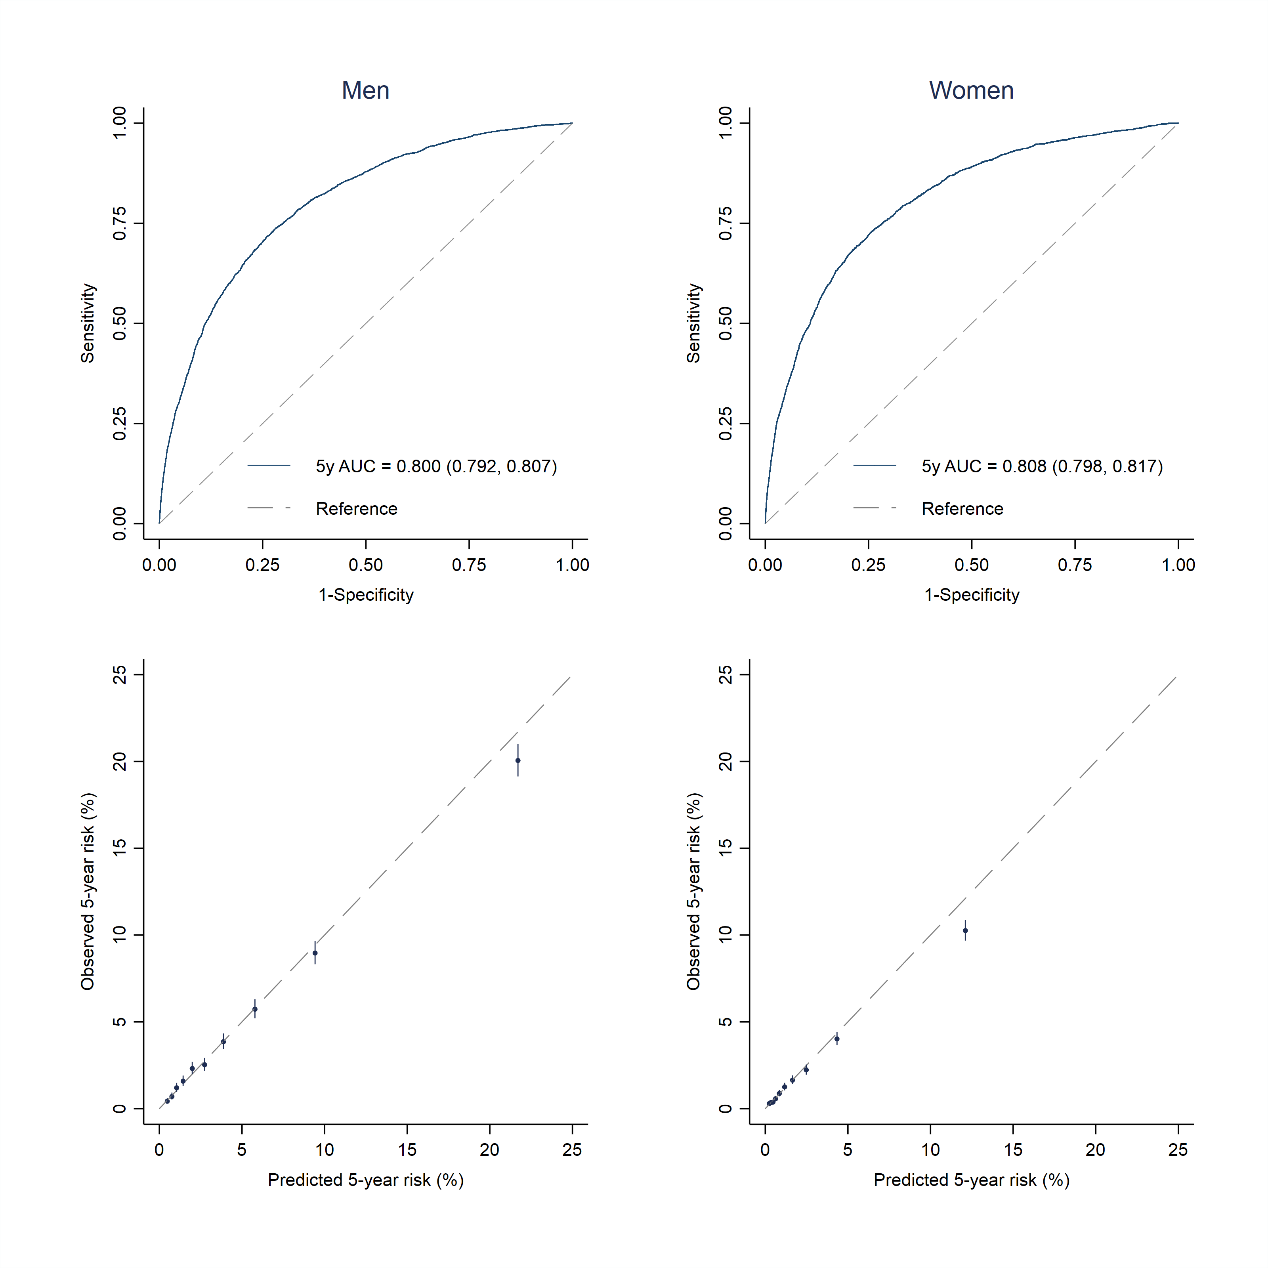
**

**Supplementary Figure 2. Receiver operating characteristic (ROC) curves and calibration plots of the 5-year all-cause mortality prediction model in the validation dataset of China Kadoorie Biobank for men and women.**

AUC indicates the area under the ROC curve.

The observed 5-year risk was estimated using Kaplan-Meier and plotted against the model-predicted risk by decile.


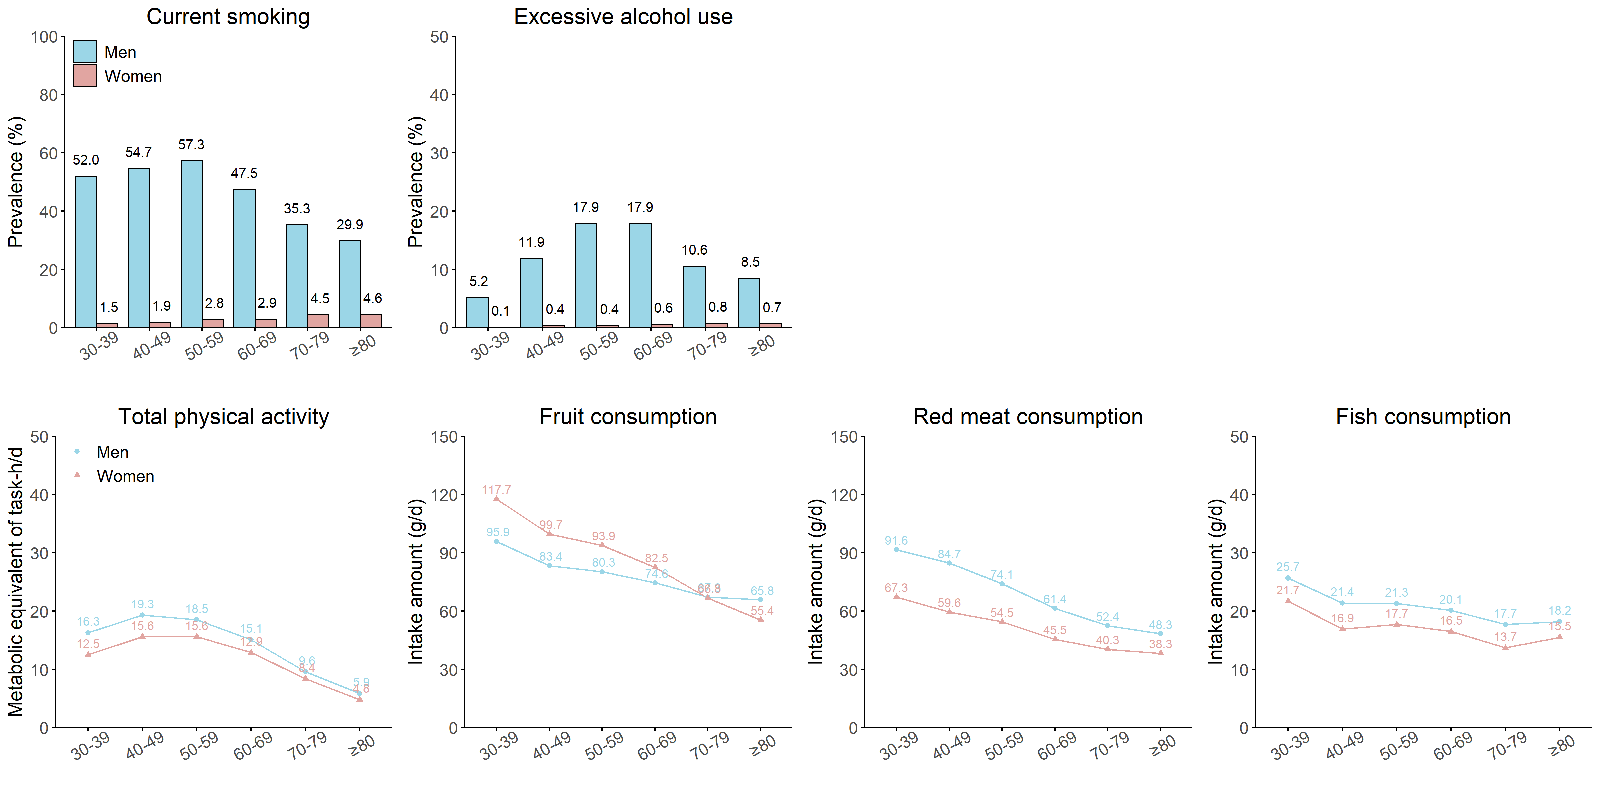


**Supplementary Figure 3. Age-specific distribution of lifestyle factors in China Nutrition and Health Surveillance.**

Excessive alcohol use was defined as consuming ≥30 g of pure alcohol per day.


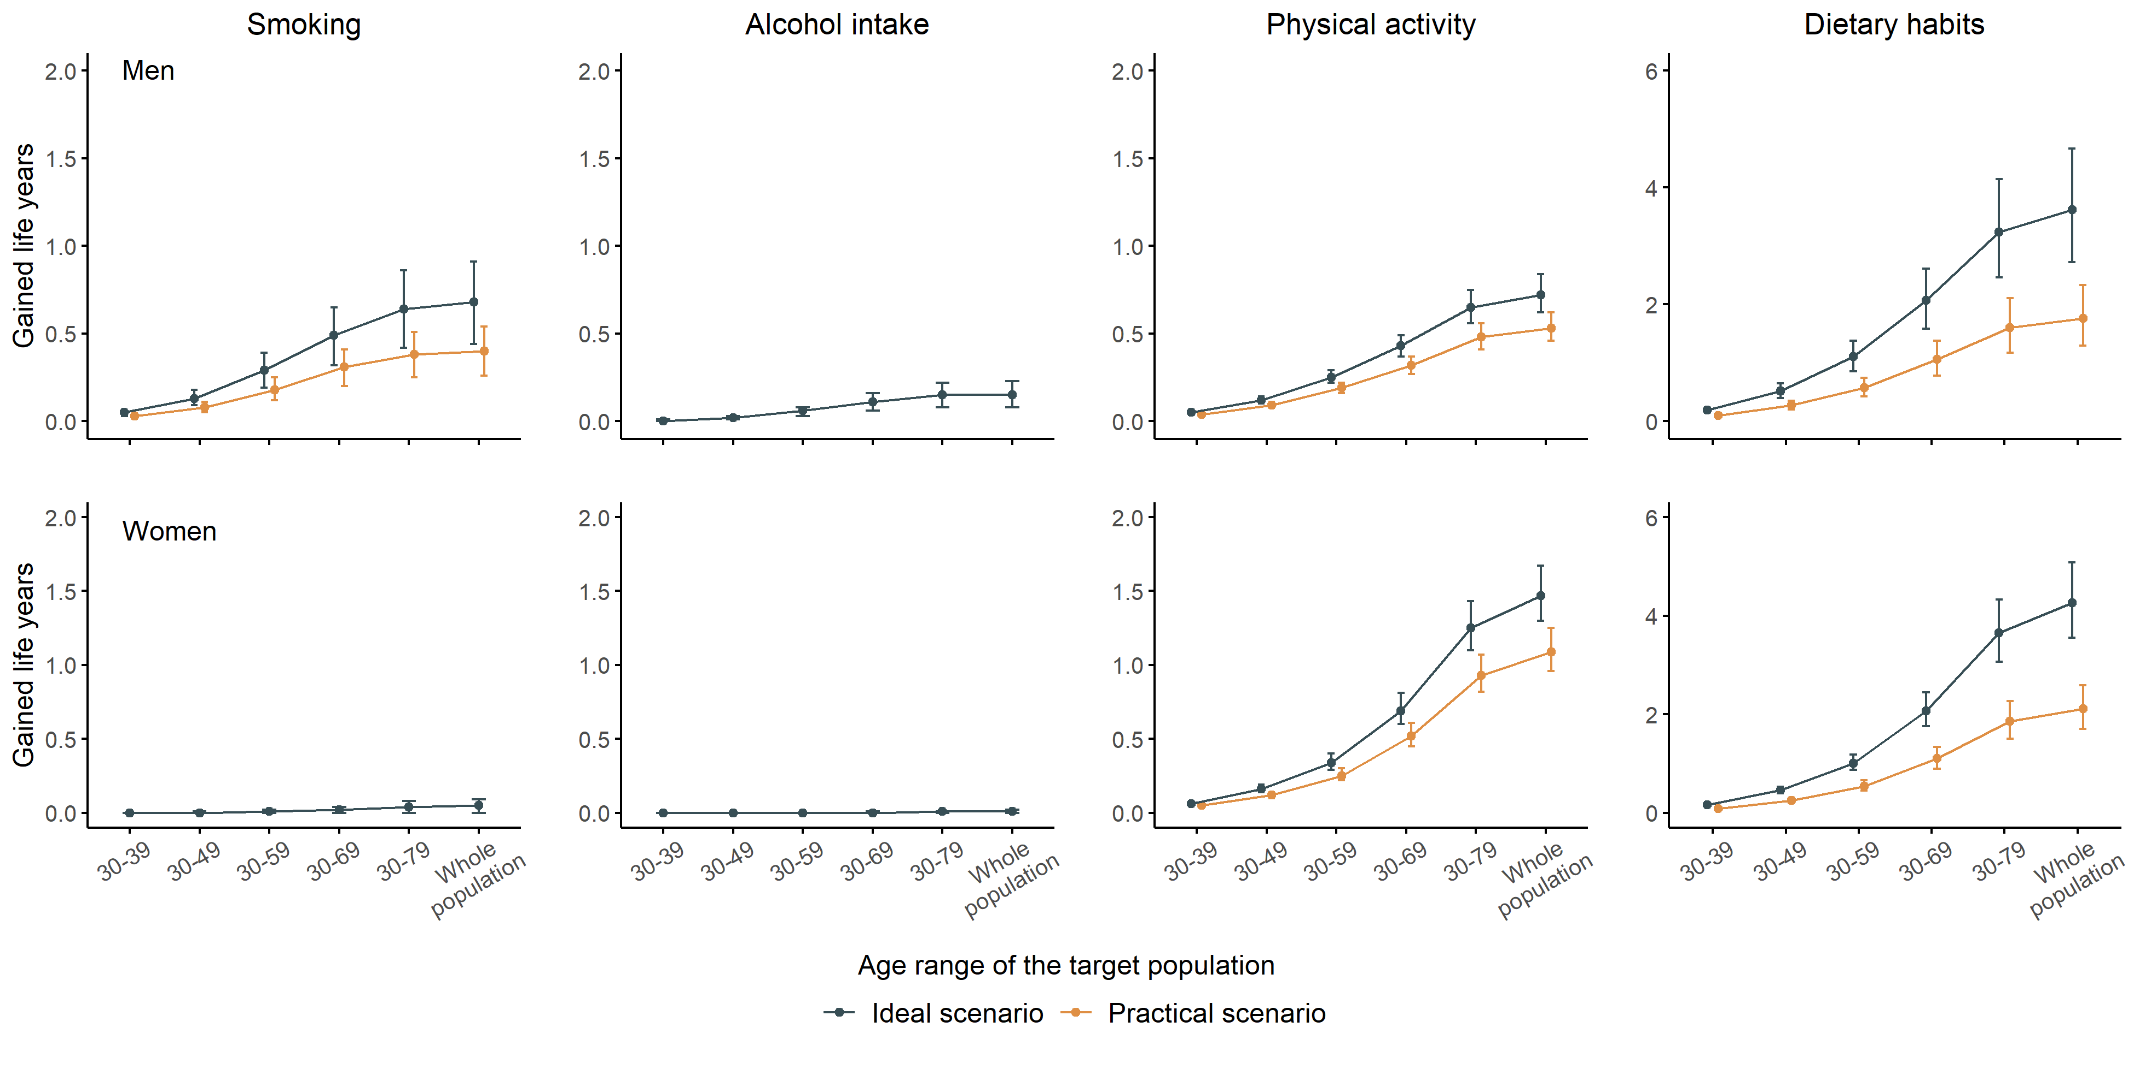


**Supplementary Figure 4. Gained life years at age 30 for men and women from adopting individual low-risk lifestyle habits, with the target population having different age ranges.**

The definitions of ideal and practical scenarios for each lifestyle factor are the same as in Table 1.
